# Supplementary material for: A Two-Year Occurrence of Fusarium T-2 and HT-2 Toxin in Croatian Cereals Relative of the Regional Weather
Source: PubMed Central journal article supplement (PMC7827321; doi:10.3390/toxins13010039), 2021-01-07
Supplement: toxins-13-00039-s001.pdf [file toxins-13-00039-s001.pdf]

# A Two-Year Occurrence of *Fusarium* T-2 and HT-2 Toxin in Croatian Cereals Relative of the Regional Weather

Maja Kiš, Ana Vulić, Nina Kudumija, Bojan Šarkanj, Vesna Jaki Tkalec, Krunoslav Aladić, Mario Škrivanko, Sanja Furmeg and Jelka Pleadin

**Table S1.** Concentrations of T-2 and HT-2 toxin determined by both ELISA and LC-MS/MS method in unprocessed cereals in which sum concentrations of these toxins surpassed the ELISA's limit of detection (LOD), shown for each cereal species, year of sampling and the production district seated in one of the three Croatian regions under study.

| Cereals Species | Year of Sampling | District of Croatia | Concentrations (µg/kg) |                       |              |               |
|-----------------|------------------|---------------------|------------------------|-----------------------|--------------|---------------|
|                 |                  |                     | ELISA Sum T-2/HT-2     | LC-MS/MS Sum T-2/HT-2 | LC-MS/MS T-2 | LC-MS/MS HT-2 |
| Maize (n = 7)   | 2017             | Požega-Slavonija    | 277.5                  | 252.8                 | 128.5        | 124.3         |
|                 | 2017             | Brod-Posavina       | 47.3                   | 45.1                  | 12.3         | 32.8          |
|                 | 2017             | Brod-Posavina       | 30.4                   | 28.4                  | 8.3          | 20.1          |
|                 | 2017             | Osijek-Baranja      | 38.9                   | 35.2                  | 11.5         | 23.7          |
|                 | 2018             | Koprivnica-Križevci | 48.7                   | 42.2                  | 7.4          | 34.8          |
|                 | 2018             | Osijek-Baranja      | 41                     | 35.6                  | 7.9          | 27.7          |
|                 | 2018             | Osijek-Baranja      | 323.5                  | 332.3                 | 107.9        | 224.4         |
| Wheat (n = 4)   | 2017             | Koprivnica-Križevci | 45.6                   | 42.1                  | 11.7         | 30.4          |
|                 | 2018             | Koprivnica-Križevci | 32.1                   | 27.5                  | 7.4          | 20.1          |
|                 | 2018             | Vukovar-Srijem      | 30.2                   | 30.5                  | 6.4          | 24.1          |
|                 | 2018             | Vukovar-Srijem      | 40.5                   | 36.5                  | 9.3          | 27.2          |
| Barley (n = 5)  | 2017             | Brod-Posavina       | 60.3                   | 52.1                  | 10.2         | 42.1          |
|                 | 2017             | Osijek-Baranja      | 50.2                   | 40.9                  | 10.4         | 30.5          |
|                 | 2017             | Vukovar-Srijem      | 49.5                   | 45.1                  | 15.9         | 29.2          |
|                 | 2017             | Koprivnica-Križevci | 32.5                   | 27.4                  | 6.7          | 20.7          |
|                 | 2017             | Koprivnica-Križevci | 54.9                   | 51.8                  | 10.6         | 41.2          |
| Oat (n = 17)    | 2017             | Požega-Slavonija    | 65.8                   | 59.3                  | 9.4          | 49.9          |
|                 | 2017             | Požega-Slavonija    | 60.3                   | 58.2                  | 13.9         | 44.3          |
|                 | 2017             | Požega-Slavonija    | 67.5                   | 65.2                  | 7.5          | 57.7          |
|                 | 2017             | Požega-Slavonija    | 80.4                   | 70.3                  | 11.6         | 58.7          |
|                 | 2017             | Požega-Slavonija    | 214.8                  | 203.8                 | 44.5         | 159.3         |
|                 | 2017             | Koprivnica-Križevci | 87.9                   | 90.2                  | 22.9         | 67.3          |
|                 | 2017             | Koprivnica-Križevci | 230.4                  | 212.8                 | 52.3         | 160.5         |
|                 | 2017             | Zagrebačka          | 125.1                  | 90.3                  | 11.5         | 78.8          |
|                 | 2018             | Koprivnica-Križevci | 200.2                  | 179.1                 | 22.68        | 156.42        |
|                 | 2018             | Koprivnica-Križevci | 86.4                   | 67                    | 5.4          | 61.56         |
|                 | 2018             | Koprivnica-Križevci | 91.6                   | 72.4                  | 25.2         | 47.16         |
|                 | 2018             | Koprivnica-Križevci | 73.1                   | 112.3                 | 32.04        | 80.28         |
|                 | 2018             | Koprivnica-Križevci | 264.4                  | 192.4                 | 35.46        | 156.96        |
|                 | 2018             | Koprivnica-Križevci | 187.2                  | 121                   | 59.04        | 61.92         |
|                 | 2018             | Požega-Slavonija    | 30.8                   | 25.4                  | 5.3          | 20.1          |
|                 | 2018             | Požega-Slavonija    | 30.4                   | 30.7                  | 8.6          | 22.1          |
|                 | 2018             | Požega-Slavonija    | 129.3                  | 114.5                 | 34.3         | 80.2          |

Region 1—Eastern Croatia: Brod-Posavina, Vukovar-Srijem, Osijek-Baranja, Virovitica-Posravina and Požega-Slavonija district

Region 2—Northern Croatia: Koprivnica-Križevci district

Region 3—Central Croatia: Sisak-Moslavina and Zagrebačka district
